# Supplementary material
Source: publisher site journal article supplement (https://www.dovepress.com/article/374207)
Supplement: Supplementary file 1 [file get_supplementary_file.php]

**Table S1 PRISMA checklist**

| **Section/topic** | **#** | **Checklist item** | **Reported on page #** |
| --- | --- | --- | --- |
| **TITLE** | | |  |
| Title | 1 | Identify the report as a systematic review, meta-analysis, or both. | 1 |
| **ABSTRACT** | | |  |
| Structured summary | 2 | Provide a structured summary including, as applicable: background; objectives; data sources; study eligibility criteria, participants, and interventions; study appraisal and synthesis methods; results; limitations; conclusions and implications of key findings; systematic review registration number. | 2 |
| **INTRODUCTION** | | |  |
| Rationale | 3 | Describe the rationale for the review in the context of what is already known. | 3 |
| Objectives | 4 | Provide an explicit statement of questions being addressed with reference to participants, interventions, comparisons, outcomes, and study design (PICOS). | 4 |
| **METHODS** | | |  |
| Protocol and registration | 5 | Indicate if a review protocol exists, if and where it can be accessed (e.g., Web address), and, if available, provide registration information including registration number. | Not yet registered |
| Eligibility criteria | 6 | Specify study characteristics (e.g., PICOS, length of follow-up) and report characteristics (e.g., years considered, language, publication status) used as criteria for eligibility, giving rationale. | 4 |
| Information sources | 7 | Describe all information sources (e.g., databases with dates of coverage, contact with study authors to identify additional studies) in the search and date last searched. | 4 |
| Search | 8 | Present full electronic search strategy for at least one database, including any limits used, such that it could be repeated. | 4 and 5, Table 1, |
| Study selection | 9 | State the process for selecting studies (i.e., screening, eligibility, included in systematic review, and, if applicable, included in the meta-analysis). | 5, Figure 1 |
| Data collection process | 10 | Describe method of data extraction from reports (e.g., piloted forms, independently, in duplicate) and any processes for obtaining and confirming data from investigators. | 5 |
| Data items | 11 | List and define all variables for which data were sought (e.g., PICOS, funding sources) and any assumptions and simplifications made. | 5 |
| Risk of bias in individual studies | 12 | Describe methods used for assessing risk of bias of individual studies (including specification of whether this was done at the study or outcome level), and how this information is to be used in any data synthesis. | 5 |
| Summary measures | 13 | State the principal summary measures (e.g., risk ratio, difference in means). | Not applicable |
| Synthesis of results | 14 | Describe the methods of handling data and combining results of studies, if done, including measures of consistency (e.g., I2) for each meta-analysis. | Not applicable |
| Risk of bias across studies | 15 | Specify any assessment of risk of bias that may affect the cumulative evidence (e.g., publication bias, selective reporting within studies). | Not applicable |
| Additional analyses | 16 | Describe methods of additional analyses (e.g., sensitivity or subgroup analyses, meta-regression), if done, indicating which were pre-specified. | Not applicable |
| **RESULTS** | | |  |
| Study selection | 17 | Give numbers of studies screened, assessed for eligibility, and included in the review, with reasons for exclusions at each stage, ideally with a flow diagram. | 5 and 6, Figure 1 |
| Study characteristics | 18 | For each study, present characteristics for which data were extracted (e.g., study size, PICOS, follow-up period) and provide the citations. | 6, Table 1 |
| Risk of bias within studies | 19 | Present data on risk of bias of each study and, if available, any outcome level assessment | Not applicable |
| Results of individual studies | 20 | For all outcomes considered (benefits or harms), present, for each study: (a) simple summary data for each intervention group (b) effect estimates and confidence intervals, ideally with a forest plot. | Not applicable |
| Synthesis of results | 21 | Present results of each meta-analysis done, including confidence intervals and measures of consistency. | Not applicable |
| Risk of bias across studies | 22 | Present results of any assessment of risk of bias across studies | Not applicable |
| Additional analysis | 23 | Give results of additional analyses, if done (e.g., sensitivity or subgroup analyses, meta-regression | Not applicable |
| **DISCUSSION** | | |  |
| Summary of evidence | 24 | Summarize the main findings including the strength of evidence for each main outcome; consider their relevance to key groups (e.g., healthcare providers, users, and policy makers). | 6-8 |
| Limitations | 25 | Discuss limitations at study and outcome level (e.g., risk of bias), and at review-level (e.g., incomplete retrieval of identified research, reporting bias). | 8 |
| Conclusions | 26 | Provide a general interpretation of the results in the context of other evidence, and implications for future research. | 8 |
| **FUNDING** | | |  |
| Funding | 27 | Describe sources of funding for the systematic review and other support (e.g., supply of data); role of funders for the systematic review. | Not applicable |

**Notes:** PRISMA figure adapted from Liberati A, Altman D, Tetzlaff J, et al. The PRISMA statement for reporting systematic reviews and meta-analyses of studies that evaluate health care interventions: explanation and elaboration. Journal of clinical epidemiology. 2009;62(10). Creative Commons.

**Table_S2 Quality assessment of barriers to the adoption of ICT in the Ethiopian healthcare system included studies in this systematic review.**

| **Author, year of**  **Study** | **Q1** | **Q2** | **Q3** | **Q4** | **Q5** | **Q6** | **Q7** | **Q8** | **Q9** | **Total score (9%)** |
| --- | --- | --- | --- | --- | --- | --- | --- | --- | --- | --- |
| Asemahagn et.al, 2015[1] | Y | Y | Y | Y | Y | Y | Y | Y | Y | 9 |
| Seboka et.al, 2021[2] | Y | Y | Y | Y | Y | Y | Y | Y | Y | 9 |
| Meseret et.al, 2020[3] | NR | Y | NA | Y | Y | Y | Y | Y | Y | 7 |
| Mohammed et al, 2013[4] | Y | Y | Y | Y | Y | Y | Y | Y | Y | 9 |
| Tsigie et al, 2021[5] | Y | Y | Y | Y | Y | Y | NR | Y | Y | 8 |
| Woreta et al, 2020[6] | Y | Y | Y | Y | Y | Y | Y | Y | Y | 9 |
| Hailegebreal et al, 2022 [7] | Y | Y | Y | Y | Y | Y | Y | Y | Y | 9 |
| Alwan et al, 2015[8] | Y | NR | Y | Y | Y | Y | Y | Y | Y | 8 |
| Adane et al, 2010[9] | Y | NR | Y | Y | NR | NR | Y | Y | Y | 7 |

**Key:** **Y**= Yes; **NR**= Not reported, **NA**=Not appropriate

**Question codes:**

1. Was the sample frame appropriate to address the target population?

2. Were study participants sampled in an appropriate way?

3. Was the sample size adequate?

4. Were the study subjects and the setting described in detail?

5. Was the data analysis conducted with sufficient coverage of the identified sample?

6. Were valid methods used for the identification of the condition?

7. Was the condition measured in a standard, reliable way for all participants?

8. Was there appropriate statistical analysis?

9. was the response rate adequate, and if not, was the low response rate managed appropriately?

**References**

1. Asemahagn M. Challenges of ICTs Utilization among Health Professionals: The Case of Public Hospitals in Addis Ababa, Ethiopia.SM J Public Health Epidemiol.2015;1(3):1012

2. Seboka BT, Yilma TM, Birhanu AY. Factors influencing healthcare providers’ attitude and willingness to use information technology in diabetes management.BMC medical informatics and decision making.2021;21(1):1-10

3. Meseret M, Tesfu M, Alemayehu M, Abebe Y. Knowledge and Attitude Towards ICT Among Medical Record Unit Workers, Northwest Ethiopia, 2018: Institutional Based Cross-Sectional Study.International Journal of Wireless Communications and Mobile Computing.2020;8(1):1

4. Mohammed E, Andargie G, Meseret S, Girma E. Knowledge and utilization of computer among health workers in Addis Ababa hospitals, Ethiopia: computer literacy in the health sector.BMC research notes.2013;6(1):1-8

5. Tsigie SE, Dagnaw GA. Knowledge and Utilization of Information Communication Technologies (ICTs) among Health Professionals at Debretabor Referral Hospital, Northwest Ethiopia.International Journal.2021;10(2)

6. Woreta SA, Kebede Y, Zegeye DT. Knowledge and utilization of information communication technology (ICT) among health science students at the University of Gondar, North Western Ethiopia.BMC medical informatics and decision making.2013;13(1):1-7

7. Hailegebreal S, Sedi TT, Belete S, Mengistu K, Getachew A, Bedada D, et al. Utilization of information and communication technology (ICT) among undergraduate health science students: a cross-sectional study.BMC Medical Education.2022;22(1):1-7

8. Alwan K, Ayele TA, Tilahun B. Knowledge and utilization of computers among health professionals in a developing country: a cross-sectional study.JMIR Human Factors.2015;2(1):e4184

9. Adane M, Lessa L, Shiferaw S. Knowledge, attitude and utilization of information communication technologies (ICTs) in an Ethiopian Medical Teaching Hospital.NesglobalOrg.2010;10:105-10
